# Supplementary material for: Oligonucleotide Solid Nucleolipid Nanoparticles against Antibiotic Resistance of ESBL-Producing Bacteria
Source: MDPI journal article supplement (doi:10.3390/pharmaceutics14020299), 2022-01-27
Supplement: s1 [file s1]

Supplementary information of the article

# Oligonucleotide solid nucleolipid nanoparticles against antibiotic resistance of ESBL-producing bacteria

Phuoc Vinh Nguyen, Clémentine Aubry, Narimane Boudaoud, Alexandra Gaubert, Marie-Hélène Langlois, Mathieu Marchivie, Karen Gaudin, Corinne Arpin, Philippe Barthélémy and Tina Kauss

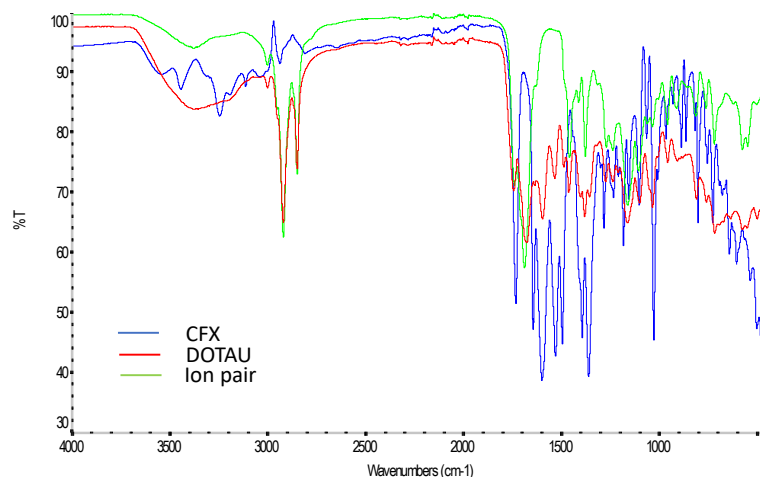

**Figure S1.** Infrared spectra of DOTAU, CFX and CFX-DOTAU ion pair.

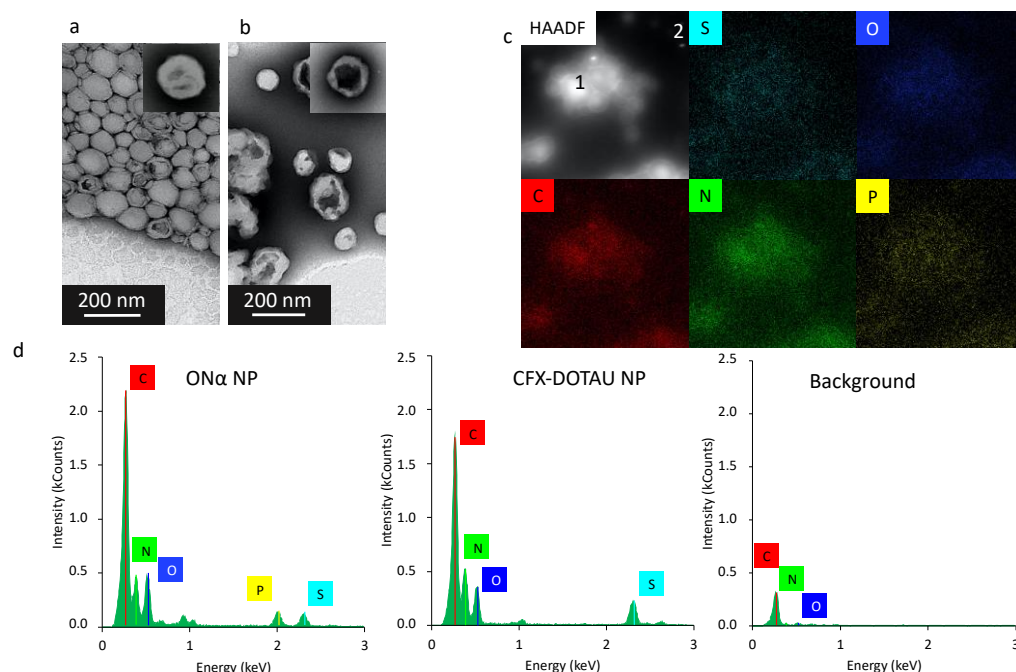

**Figure S2.** TEM images and zoom on a single particle of (a) ON $\alpha_{600}$  NP and (b) CFX-DOTAU NP; (c) STEM compositional mapping of ON $\alpha_{600}$  NP and (d) intensity counted by energy dispersive-X-ray spectroscopy for bands specific of C, N, O, P, S atoms for ON $\alpha_{600}$  NP (zone 1 on HAADF image), CFX-DOTAU NP and Background (zone 2 on HAADF image).

**Table S1.** NP size, PDI and zeta potential (mean  $\pm$  SD, n=6) upon sample dilution for CFX-DOTAU and ON $\alpha$  NP.

| NP Formulation | Dilution | Size (nm)        | PDI               | Zeta (mV)       |
|----------------|----------|------------------|-------------------|-----------------|
| CFX-DOTAU NP   | 1/100    | 155.9 $\pm$ 1.6  | 0.137 $\pm$ 0.016 | 35.9 $\pm$ 1.1  |
|                | 1/200    | 157.1 $\pm$ 2.1  | 0.146 $\pm$ 0.016 | 39.2 $\pm$ 2.6  |
|                | 1/500    | 160.0 $\pm$ 2.3  | 0.181 $\pm$ 0.024 | 31.2 $\pm$ 8.1  |
|                | 1/1000   | 167.4 $\pm$ 11.0 | 0.208 $\pm$ 0.054 | 31.2 $\pm$ 11.9 |
| ON $\alpha$ NP | 1/100    | 185.2 $\pm$ 8.7  | 0.158 $\pm$ 0.036 | -55.2 $\pm$ 0.9 |
|                | 1/200    | 182.1 $\pm$ 13.3 | 0.157 $\pm$ 0.049 | -53.4 $\pm$ 4.8 |
|                | 1/500    | 183.2 $\pm$ 14.7 | 0.157 $\pm$ 0.055 | -48.9 $\pm$ 5.7 |
|                | 1/1000   | 180.0 $\pm$ 7.2  | 0.164 $\pm$ 0.029 | -45.4 $\pm$ 4.6 |
